# Supplementary material for: Exact p-value calculation for heterotypic clusters of regulatory motifs and its application in computational annotation of cis-regulatory modules
Source: PubMed Central journal article supplement (PMC2174486; doi:10.1186/1748-7188-2-13), 2007-10-10
Supplement: 1748-7188-2-13-S1.pdf [file 1748-7188-2-13-S1.pdf]

# Additional file 1: Exact p-value calculation for heterotypic clusters of regulatory motifs and its use in computational annotation of *cis*-regulatory modules

Valentina Boeva<sup>\*1,2</sup>, Julien Clément<sup>3</sup>, Mireille Régnier<sup>2</sup>, Mikhail A. Roytberg<sup>4,5</sup> and Vsevolod J. Makeev<sup>1,6</sup>

<sup>1</sup>Institute of Genetics and Selection of Industrial Microorganisms, GosNII Genetika, 117545 Moscow, Russia

<sup>2</sup>INRIA Rocquencourt, 78153 Le Chesnay, France

<sup>3</sup>GREYC, CNRS UMR 6072, Laboratoire d'informatique, 14032 Caen, France

<sup>4</sup>Institute of Mathematical Problems of Biology, Russian Academy of Sciences, Puschino, Moscow Region, Russia

<sup>5</sup>Puschino State University, Puschino, Moscow Region, Russia

<sup>6</sup>Engelhardt Institute of Molecular Biology, Russian Academy of Sciences, Moscow, Russia

Email: Valentina Boeva\* - valeyov@imb.ac.ru; Julien Clément - Julien.Clement@info.unicaen.fr; Mireille Régnier - Mireille.Regnier@inria.fr; Mikhail A. Roytberg - mroytberg@impb.psn.ru; Vsevolod J. Makeev - makeev@genetika.ru;

\*Corresponding author

## Bernoulli text model. Probability to find multiple occurrences of a single motif

Here the problem is to calculate the  $p$ -value of finding of at least  $k$  possibly overlapping occurrences of a motif  $\mathcal{H}$  in the random text  $T_n$  generated as a Bernoulli random model over  $\Sigma$ .

Again, all texts  $T_i$  are divided into classes containing different number of occurrences of  $\mathcal{H}$ .

**Definition 1** A text  $T_i$  belongs to the class  $C_i(l, q)$ ,  $0 \leq l \leq k - 1$  iff

1. Length of  $T_i$  equals  $i$ ,
2.  $T_i$  contains exactly  $l$  possibly overlapping words from  $\mathcal{H}$ ;
3. A traversal  $AC(\mathcal{T}(\mathcal{H}), T_i)$  ends in node  $q$ .

A text  $T_i$  belongs to the class  $G_i(k)$  if and only if the length of  $T_i$  equals  $i$  and  $T_i$  contains at least  $k$  possibly overlapping occurrences of words from  $\mathcal{H}$ .

The idea of the algorithm in this case is based on two following observations. First, let a traversal  $AC(\mathcal{T}(\mathcal{H}), T_i)$  end at node  $q$ ;  $T_i \in C_i(l, q)$ , where  $0 \leq l \leq k - 1$  and  $\delta(q, a) \notin \mathcal{H}$ . Then the number of occurrences does not change after the transition from  $T_i$  to  $T_i a$ . Second, if text  $T_i$ , of length  $j$  has a prefix

from  $G_i(k)$ ,  $j > i$ , then  $T_i$  belongs to  $G_j(k)$ . Similarly to the previous sections, one can consider probabilities  $\mathbf{P}(C_i(l, q))$  and  $\mathbf{P}(G_i(k))$ ; the desired  $p$ -value  $\mathbf{P}(L_n(k, \mathcal{H}))$  is equal to  $\mathbf{P}(G_n(k))$ .

The initial values are:  $\mathbf{P}(C_0(0, \epsilon)) = 1$ ;  $\mathbf{P}(C_0(l, q)) = 0$  for any  $q \neq \epsilon$ , and any  $l$ :  $0 \leq l \leq k - 1$ ;  $\mathbf{P}(G_0(k)) = 0$ .

Expression for languages (5, from the main text) becomes transformed to:

$$G_{i+1}(k) = \left\{ \bigcup_{a \in \Sigma} G_i(k) \cdot a \right\} \cup \left\{ \bigcup_{(q,a):\delta(q,a) \in \mathcal{H}} C_i(k-1, q) \cdot a \right\} . \quad (1)$$

It is complemented by a series of equations for different  $l$ ,  $1 \leq l \leq k - 1$ :

$$C_{i+1}(l, q') = \begin{cases} \bigcup_{(q,a):\delta(q,a)=q'} C_i(l, q) \cdot a & \text{if } q' \notin \mathcal{H} \\ \bigcup_{(q,a):\delta(q,a)=q'} C_i(l-1, q) \cdot a & \text{if } q' \in \mathcal{H} \end{cases} \quad (2)$$

for  $l = 0$  we have:

$$\forall q' \in Q_{\mathcal{H}} \setminus \mathcal{H} : C_{i+1}(0, q') = \bigcup_{(q,a):\delta(q,a)=q'} C_i(0, q) \cdot a . \quad (3)$$

Remark that in contrast to (6, from the main text),  $q$  and  $q'$  may here belong to  $\mathcal{H}$ .

The series of equations for probabilities below steadily follow from Equations (1), (2) and (3).

$$\mathbf{P}(G_{i+1}(k)) = \mathbf{P}(G_i(k)) + \sum_{(q,a):\delta(q,a) \in \mathcal{H}} \mathbf{P}(C_i(k-1, q)) \cdot p(a), \quad (4)$$

$$\mathbf{P}(C_{i+1}(l, q')) = \begin{cases} \sum_{(q,a):\delta(q,a)=q'} \mathbf{P}(C_i(l, q)) \cdot p(a) & \text{if } q' \notin \mathcal{H} \\ \sum_{(q,a):\delta(q,a)=q'} \mathbf{P}(C_i(l-1, q)) \cdot p(a) & \text{if } q' \in \mathcal{H} \end{cases} \quad (5)$$

$$\forall q' \notin \mathcal{H} : \mathbf{P}(C_{i+1}(0, q')) = \sum_{(q,a):\delta(q,a)=q'} \mathbf{P}(C_i(0, q)) \cdot p(a) . \quad (6)$$

The running time of the computation of  $G_i(k)$  and  $C_{i+1}(l, q)$  for any  $l$ ,  $0 \leq l \leq k - 1$ , is  $O(|Q_{\mathcal{H}}| \cdot |\Sigma|)$ ; therefore the total time of all  $n$  stages of  $p$ -value computation is  $O(|Q_{\mathcal{H}}| \cdot |\Sigma| \cdot nk)$ .
